# Supplementary material for: In situ activated mesenchymal stem cells (MSCs) by bioactive hydrogels for myocardial infarction treatment
Source: Royal Society of Chemistry journal article supplement (doi:10.1039/d0tb01320j), 2020-01-01
Supplement: d0tb01320j1.pdf [file d0tb01320j1.pdf]

## Supporting Information

Table S1 Primer sequences for the related genes

| Gene       | Primer sequences (5' to 3') |
|------------|-----------------------------|
| R-VEGF-F   | TGCGGATCAAACCTCACCA         |
| R-VEGF-R   | CAGGGATTTTTCTTGTCTTGCT      |
| R-GATA4-F  | ACGTTCTCAGTCAGTGCATG        |
| R-GATA4-R  | CAGGTCCGTGCAGGAATTTG        |
| R-cTnT -F  | GGGCTGAACAGCAGCGTAT         |
| R-cTnT-R   | CCACTCTCCGCTCTGTCTG         |
| R-GAPDH -F | GGCATCGTGGAAGGGCTCAT        |
| R-GAPDH-R  | GGGATGACCTTGCCCACAG         |
| H-cTnT -F  | GGGGTTACATCCAGAAGACAG       |
| H-cTnT -R  | CACAGCTCCTTGGCCTTCTC        |
| H-VEGF-F   | TATGCGGATCAAACCTCACCA       |
| H-VEGF-R   | CACAGGGATTTTTCTTGTCTTGCT    |
| H-GAPDH -F | GGCATCGTGGAAGGGCTCAT        |
| H-GAPDH-R  | GGGATGACCTTGCCCACAG         |
| R-Cx43-F   | GAGTCGCATTGGGTGAACATAGA     |
| R-Cx43-R   | GTAGACCAGGGAAGCTTACCTG      |

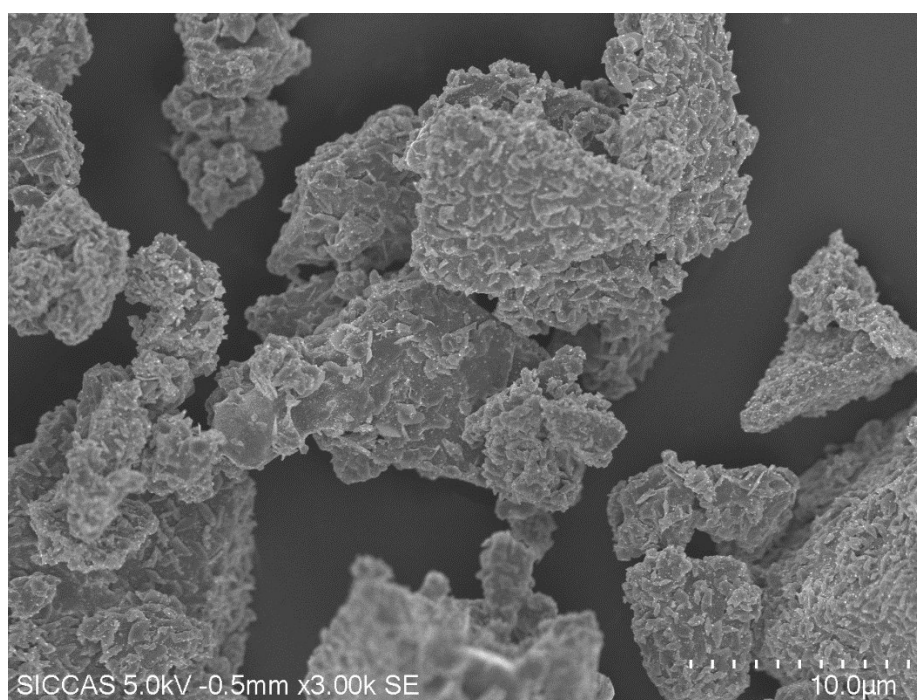

Fig S1 The morphology of BG

Table S2 The chemical composition of BG obtained by ICP-OES

| Composition (%)               | Theoretical value | Detection value |
|-------------------------------|-------------------|-----------------|
| SiO <sub>2</sub>              | 45.0              | 44.7            |
| Na <sub>2</sub> O             | 24.5              | 24.4            |
| CaO                           | 24.5              | 24.8            |
| P <sub>2</sub> O <sub>5</sub> | 6.0               | 5.7             |
